# Supplementary material for: Biofeedback efficacy for outlet dysfunction constipation: Clinical outcomes and predictors of response by a limited approach
Source: PubMed Central journal article supplement (PMC11650404; doi:10.1111/nmo.14948), 2024-10-25
Supplement: NMO-37-e14948-s001.pdf [file NMO-37-e14948-s001.pdf]

# Supplementary Material

**Table 1S.** Rome III FC questionnaire symptoms before and after BF. All symptoms' frequency decreased after BF.

|                                                                              | Before BF | After BF |     |     | p-value* |
|------------------------------------------------------------------------------|-----------|----------|-----|-----|----------|
|                                                                              |           | No       | Yes | Tot |          |
| Straining during at least 25% of defecations                                 | No        | 3        | 3   | 6   | <0,001   |
|                                                                              | Yes       | 80       | 45  | 125 |          |
|                                                                              | Tot       | 83       | 48  | 131 |          |
|                                                                              |           |          |     |     |          |
| Lumpy or hard stools in at least 25% of defecations                          | No        | 30       | 14  | 44  | <0,001   |
|                                                                              | Yes       | 64       | 23  | 87  |          |
|                                                                              | Tot       | 94       | 37  | 131 |          |
|                                                                              |           |          |     |     |          |
| Sensation of incomplete evacuation for at least 25% of defecations           | No        | 0        | 1   | 1   | <0,001   |
|                                                                              | Yes       | 85       | 45  | 130 |          |
|                                                                              | Tot       | 85       | 46  | 131 |          |
|                                                                              |           |          |     |     |          |
| Sensation of anorectal obstruction/ blockage for at least 25% of defecations | No        | 44       | 6   | 50  | <0,001   |
|                                                                              | Yes       | 47       | 34  | 81  |          |
|                                                                              | Tot       | 91       | 40  | 131 |          |
|                                                                              |           |          |     |     |          |
| Manual maneuvers to facilitate at least 25% of defecations                   | No        | 70       | 3   | 73  | 0.021    |
|                                                                              | Yes       | 13       | 45  | 58  |          |
|                                                                              | Tot       | 83       | 48  | 131 |          |
|                                                                              |           |          |     |     |          |
| Fewer than 3 defecations per week                                            | No        | 100      | 0   | 100 | <0,001   |
|                                                                              | Yes       | 21       | 10  | 31  |          |
|                                                                              | Tot       | 121      | 10  | 131 |          |
|                                                                              |           |          |     |     |          |

\*McNemar Test;

Abbreviations: BF=Biofeedback; FC=Functional Constipation

**Table 2S.** Association between manometric and BET outcomes and BF response. Patients who responded to BF significantly improves in Rome III FDD diagnoses and in BET.

|                                                               | Response to BF |    | p-value* |
|---------------------------------------------------------------|----------------|----|----------|
|                                                               | Yes            | No |          |
| Improvement after BF<br>(DD pre → No DD post)                 | 48             | 7  | <0.001   |
| No Improvement after BF<br>(DD pre → DD post)                 | 0              | 13 |          |
| Improvement after BF<br>(IRP pre → No IDP post)               | 29             | 2  | <0.001   |
| No Improvement after BF<br>(IRP pre → IDP post)               | 0              | 4  |          |
| Improvement after BF<br>(BET failed pre → BET succeeded post) | 82             | 0  | <0.001   |
| No Improvement after BF<br>(BET failed pre → BET failed post) | 2              | 47 |          |

\*Chi-Square Test

Abbreviations: BF=Biofeedback; DD=Dyssynergic defecation; IDP=Inadequate defecatory propulsion, BET=Balloon expulsion test

**Table 3S.** Rome III FC symptoms criteria frequency before and after BF therapy. In the table is reported the cumulative percentages of patients meeting the Rome III criteria for FC. After BF, 62.6% of patients showed 0 or only 1 criteria.

|                       | Before BF Therapy |           |                      | After BF Therapy |           |                      |
|-----------------------|-------------------|-----------|----------------------|------------------|-----------|----------------------|
|                       | Freq.             | Perc. (%) | Cumulative perc. (%) | Freq.            | Perc. (%) | Cumulative perc. (%) |
| <b>0 criteria met</b> | 0                 | 0         | 0                    | 63               | 48.1      | 48.1                 |
| <b>1 criteria met</b> | 0                 | 0         | 0                    | 19               | 14.5      | 62.6                 |
| <b>2 criteria met</b> | 6                 | 4.6       | 4.6                  | 1                | 0.8       | 63.4                 |
| <b>3 criteria met</b> | 46                | 35.1      | 39.7                 | 12               | 9.2       | 72.5                 |
| <b>4 criteria met</b> | 43                | 32.8      | 72.5                 | 13               | 9.9       | 82.4                 |
| <b>5 criteria met</b> | 26                | 19.8      | 92.4                 | 18               | 13.7      | 96.2                 |
| <b>6 criteria met</b> | 10                | 7.6       | 100.0                | 5                | 3.8       | 100.0                |
| <b>Tot</b>            | 131               | 100.0     |                      | 131              | 100.0     |                      |

Abbreviations: BF=Biofeedback; Freq.=Frequency; Perc.=Percentage

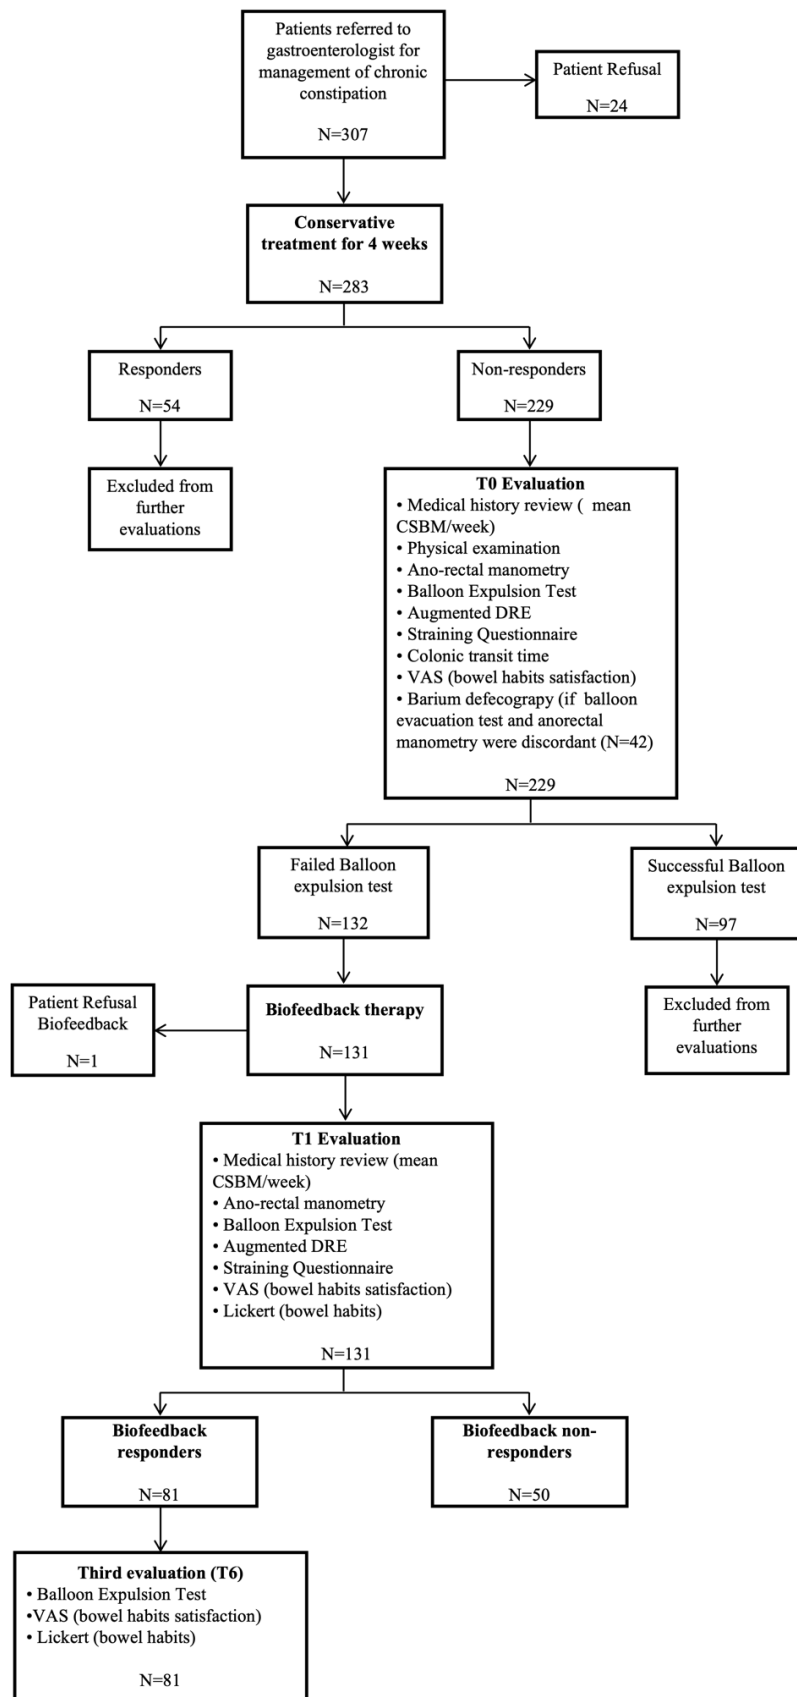

**Figure 1S. Study Design**

Abbreviations: CSBM=Complete Spontaneous Bowel Movement; VAS=Visual Analogue Scale; Augmented-DRE=digital rectal examination augmented by abdominal palpation during straining
